# Supplementary material
Source: publisher figshare collection journal article supplement (https://geolsoc.figshare.com/ndownloader/files/5426930)
Supplement: Supplementary file 1 [file 5426930]

Rock type	Specimen		K-feldspar	Plagioclase	Quartz	Cpx	Hornblende	Biotite	Magnetite	Chlorite	Epidote		Zircon	Allanite	Pyrite	Other
AP	J6047	101	35	10	50		3	2	1
BQM	J6328	100	15	30	10		10	20		15				tr
BQM	J6332	101	10	40	10		10	20	1	10			tr
BQM	J6335	100	15	45	10		10	20					tr	tr
HBQM	J6216	87	20	25	10	3	20	5	4
HBQM	J6323	100	20	30	5		30	14	1					tr	tr	sphene
HBQMP	J6317	100	25	30	5		20	20					tr
HQM	J6152	100	25	20	15		20	5	5	10			tr
HQM	J6154	99	15	30	15	4	25	7	3				tr		tr
HQM	J6176	101	10	45	10	1	30	2	1	2			tr		tr	sphene
HQM	J6179	101	25	30	15		30		1				tr		tr
HQM	J6183	98	25	25	20	1	20	7					tr			sphene
HQM	J6214	95	20	25	15		30	5					tr		3
HQM	J6316	98	20	35	10		25	7	1				tr			ilm (1)
INC	J6217	100	10	10	20		55	3	2							sphene
INC	J6315	99	10	75	10		1		3				tr			silver(1)
INC	J6364	100	15	35	20		20	5		5			tr	tr
PQM	J6054	98	3	50	2	15		3	5	20
Not analysed
PQM	J6048	100	3	35	2	35		10	5	10			tr
BQM	J6113	103	15	45	5	1	15	20	2
HQM	J6133	100	15	25	20		25	2	3	10
HQM	J6153	100	15	35	15		25	5	2	3					tr	silver
HQM	J6325	100	15	30	5		35	8	2	5			tr
INC	J6320	99	5	30	10		50	3	1					tr	tr	sphene
HQM	J6326	101	15	35	20		10	8	1	10	2					ep(2)
INC	J6326	95	10	35	20			30								herc(5)
